# Supplementary material for: Ambient Air Pollution and Acute Ischemic Stroke—Effect Modification by Atrial Fibrillation
Source: MDPI journal article supplement (doi:10.3390/jcm11185429), 2022-09-15
Supplement: s1 [file s1]

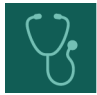

## Supplementary Materials

**Table S1.** Modification effect of age group and smoking status on air pollutant and AIS.

| Pollutant                                                      | Adjusted OR * | 95%CI       | p Value |
|----------------------------------------------------------------|---------------|-------------|---------|
| Among patients aged ≥65 years relative to those aged <65 years |               |             |         |
| PM <sub>2.5</sub>                                              | 1.000         | 0.998–1.001 | 0.519   |
| PM <sub>10</sub>                                               | 1.000         | 0.999–1.001 | 0.975   |
| O <sub>3</sub>                                                 | 1.002         | 1.000–1.004 | 0.028   |
| NO <sub>2</sub>                                                | 0.997         | 0.995–1.000 | 0.066   |
| SO <sub>2</sub>                                                | 0.996         | 0.993–0.999 | 0.008   |
| CO                                                             | 0.979         | 0.878–1.093 | 0.709   |
| Among patients who smoked relative to those who did not smoke  |               |             |         |
| PM <sub>2.5</sub>                                              | 0.999         | 0.997–1.000 | 0.096   |
| PM <sub>10</sub>                                               | 0.999         | 0.997–1.000 | 0.019   |
| O <sub>3</sub>                                                 | 0.998         | 0.996–1.000 | 0.057   |
| NO <sub>2</sub>                                                | 1.002         | 0.999–1.005 | 0.132   |
| SO <sub>2</sub>                                                | 1.005         | 1.002–1.008 | 0.001   |
| CO                                                             | 0.874         | 0.780–0.979 | 0.020   |

\* Adjusted for daily mean temperature, daily relative humidity and daily total rainfall. Abbreviations: AF—atrial fibrillation; AIS—acute ischemic stroke; CI—confidence interval; CO—carbon monoxide; NO<sub>2</sub>—nitrogen dioxide; O<sub>3</sub>—ozone; OR—odds ratio; PM<sub>2.5</sub>—particulate matter 2.5; PM<sub>10</sub>—particulate matter 10; SO<sub>2</sub>—sulfur dioxide.

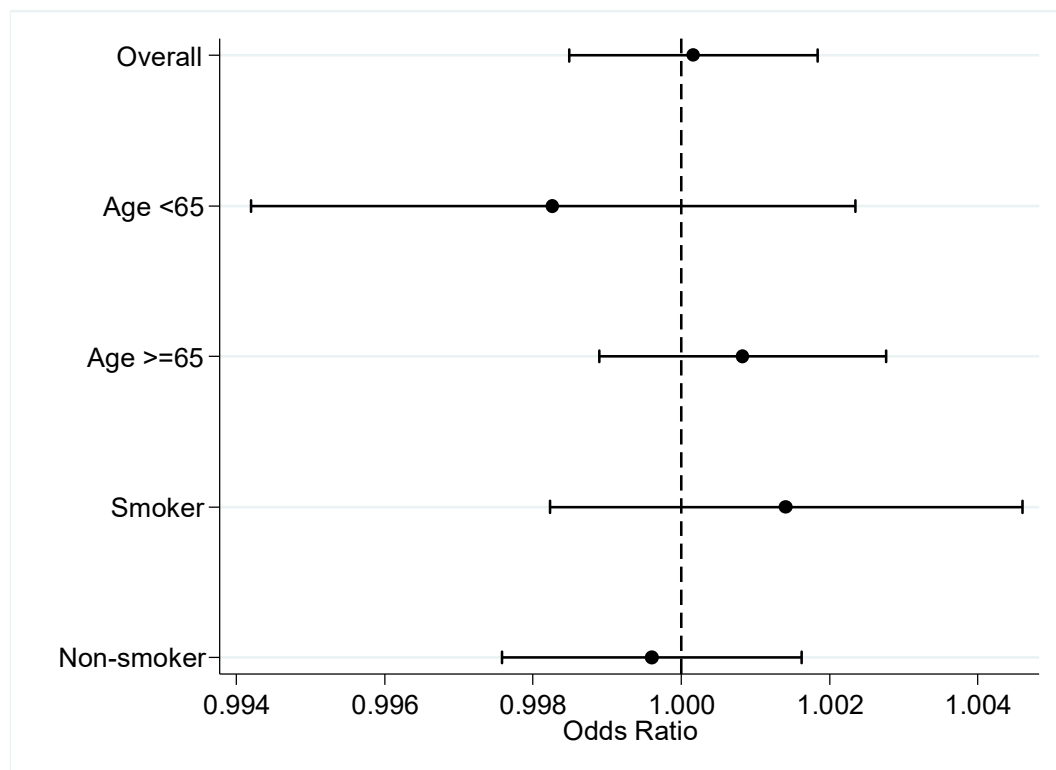

**Figure S1.** Adjusted odds of AF for PM<sub>2.5</sub> exposure among all and subgroups of AIS patients.

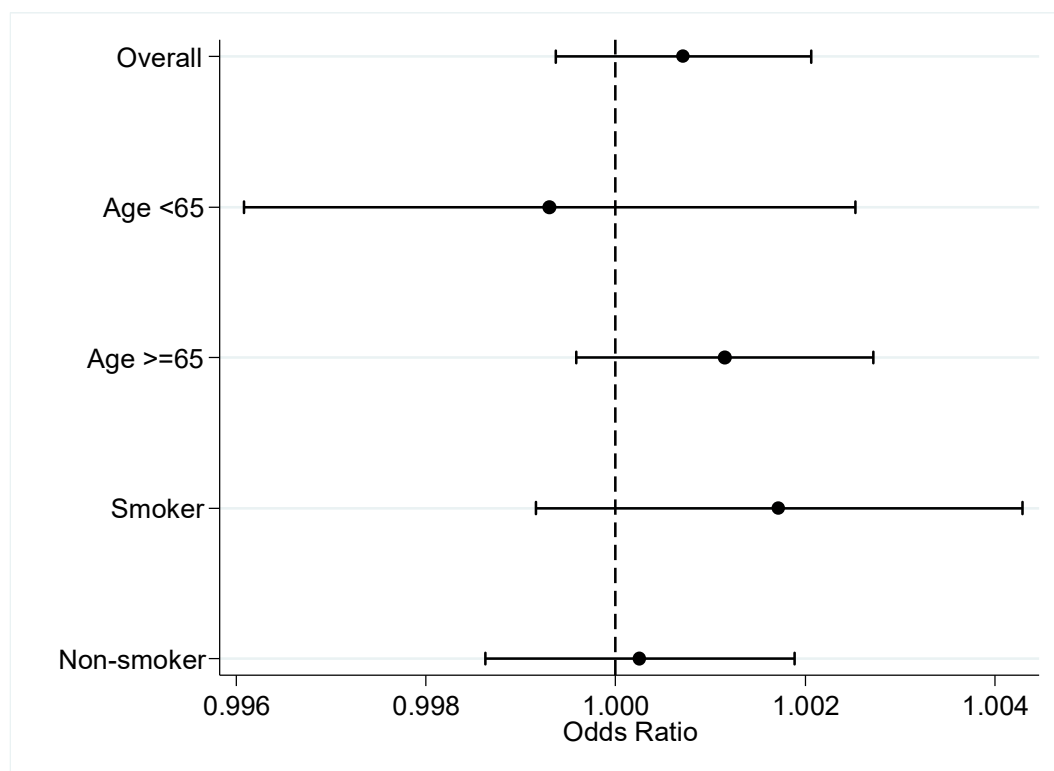

**Figure S2.** Adjusted odds of AF for PM<sub>10</sub> exposure among all and subgroups of AIS patients.

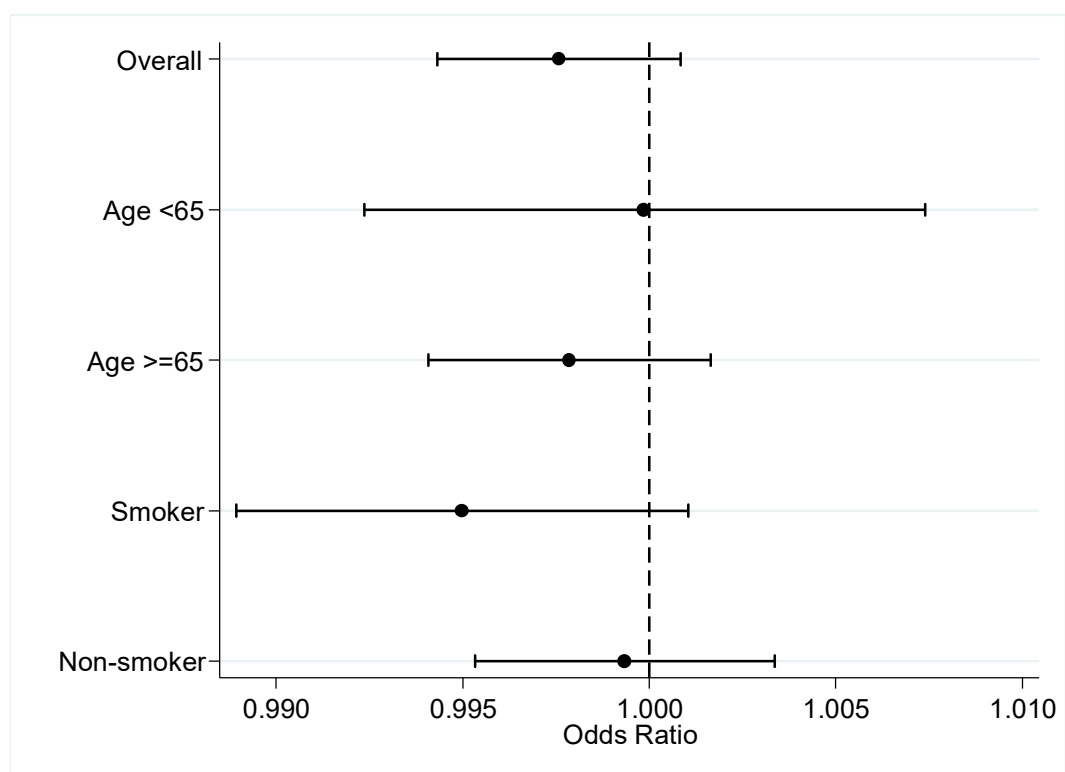

**Figure S3.** Adjusted odds of AF for NO<sub>2</sub> exposure among all and subgroups of AIS patients.
